# Supplementary material for: Wood dust exposure and lung cancer risk: a meta-analysis
Source: HighWire-hosted journal article supplement (doi:10.1136/oemed-2014-102722), 2015-09-24

Supplementary Figure 1. Funnel plot of all a) studies assessing wood dust and lung cancer risk and b) studies assessing wood dust-related occupations and lung cancer risk.

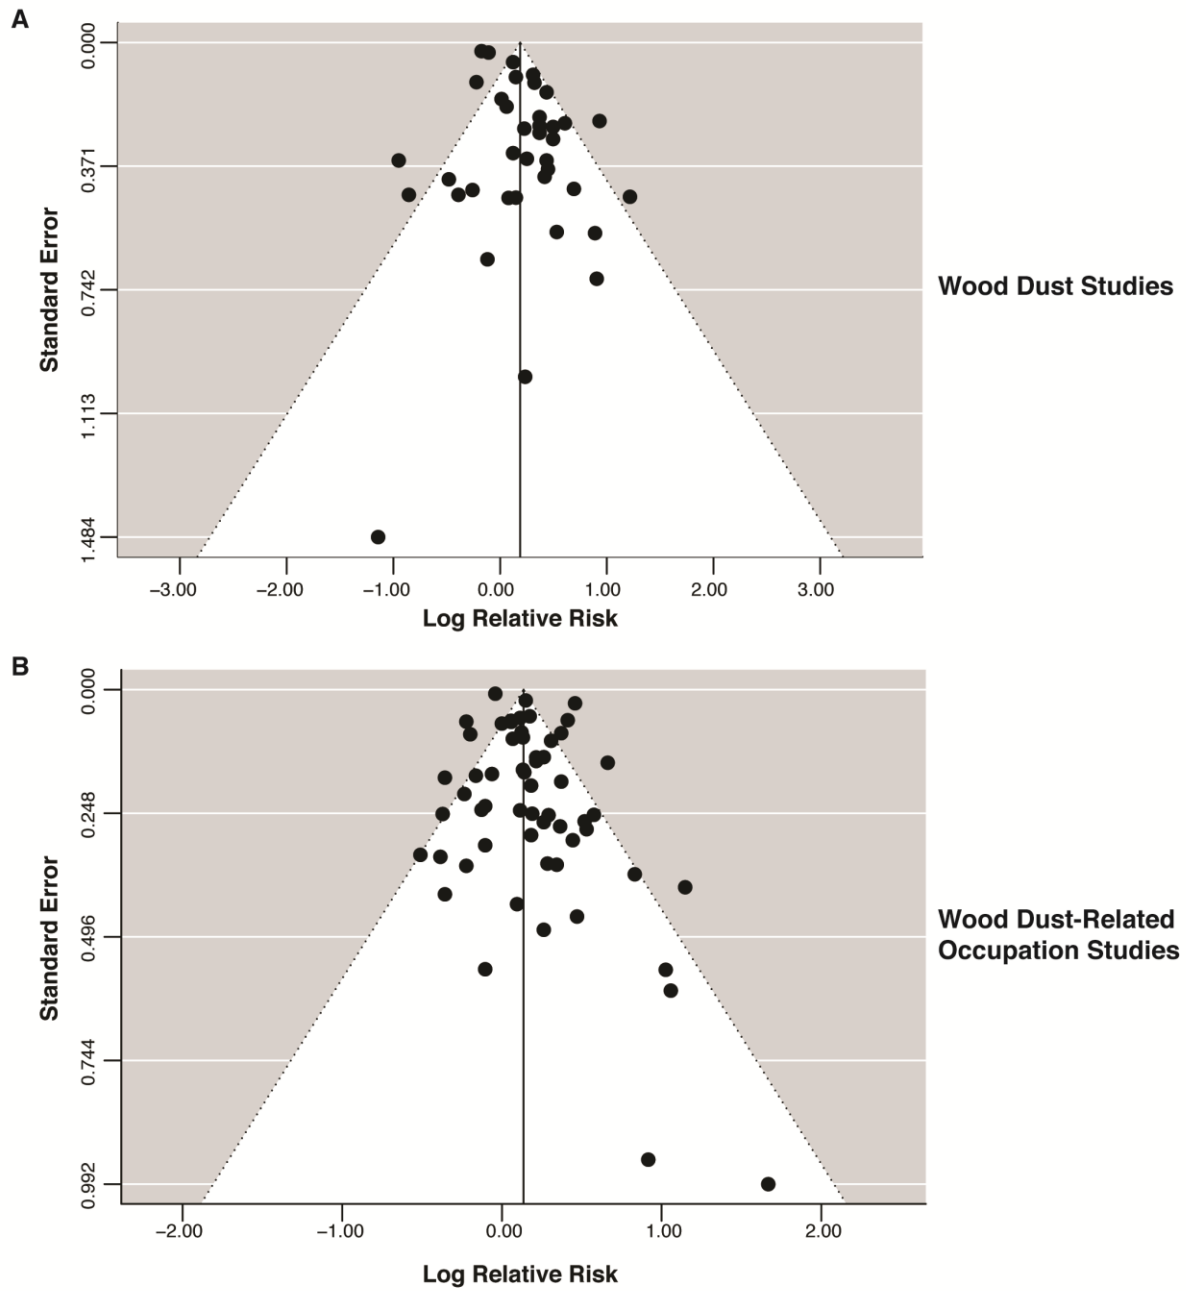

Supplement: oemed-2014-102722supp_figure.pdf [file oemed-2014-102722supp_figure.pdf]
