# Supplementary material for: Wood dust exposure and lung cancer risk: a meta-analysis
Source: HighWire-hosted journal article supplement (doi:10.1136/oemed-2014-102722), 2015-09-24
Supplement: oemed-2014-102722supp_tables.pdf [file oemed-2014-102722supp_tables.pdf]

**Supplementary Table 1.** Summary of case-control and cohort studies included in the meta-analysis

| Author Date [Ref]     | Type         | Outcome   | Control | Measure   | Smoking Control | Country | Years     | Cancer         | Point Estimate   | Cases/Ctrls OR Obs/Total Cohort | NOS |
|-----------------------|--------------|-----------|---------|-----------|-----------------|---------|-----------|----------------|------------------|---------------------------------|-----|
| Arias Bahia 2005a [1] | Cohort       | Incidence | -       | Occup (W) | N               | Brazil  | 1988-1991 | Lung           | SIR 1.2(0.7-1.9) | 18/138                          | 4   |
| Arias Bahia 2005b [1] | Cohort       | Incidence | -       | Occup (W) | N               | Brazil  | 1988-1991 | Lung           | SIR 1.8(1.1-2.8) | 18/138                          | 4   |
| Arias Bahia 2005c [1] | Cohort       | Incidence | -       | Occup (W) | N               | Brazil  | 1988-1991 | Lung           | SIR 0.7(0.4-1.1) | 18/138                          | 4   |
| Baccarelli 2006 [2]   | Case-Control | Mortality | H       | JEM       | Y               | Russia  | 1993-1998 | Lung           | OR 1.1(0.8-1.5)  | 210/717                         | 9   |
|                       |              |           |         | Occup (W) |                 |         |           | Lung           | OR 1.2(0.8-1.7)  | 540/582                         |     |
| Baker 2005 [3]        | Case-Control | Incidence | H       | SR        | Y               | US      | 1982-1998 | Lung           | OR 1.4(1.1-1.8)  | 993/986                         | 7   |
| Barcenas 2005 [4]     | Case-Control | Incidence | H       | O         | Y               | US      | 1995-2002 | Lung           | OR 1.6(1.2-2.1)  | 1368/1192                       | 7   |
|                       |              |           |         |           |                 |         |           | Adenocarcinoma | OR 1.5(1-2.1)    | 573/1192                        |     |
|                       |              |           |         |           |                 |         |           | SCLC           | OR 1.1(0.5-2.3)  | 96/1192                         |     |
|                       |              |           |         |           |                 |         |           | Squamous/LCLC  | OR 1.9(1.3-2.7)  | 544/1192                        |     |
|                       |              |           |         | Occup (W) |                 |         |           | Lung           | OR 3.2(1.5-6.9)  | 1368/1192                       |     |
| Barthel 1989 [5]      | Cohort       | Incidence | -       | Occup (F) | N               | Germany | 1973-1984 | Lung           | SIR 0.7(0.3-1.2) | 162/759                         | 6   |
| Bhatti 2011 [6]       | Case-Control | Incidence | P       | JEM       | N               | US      | 1993-1996 | Lung           | OR 0.8(0.7-1.0)  | 258/456                         | 7   |
|                       |              |           |         | Occup (C) |                 |         |           | Lung           | OR 0.7(0.5-1)    | 440/845                         |     |
| Blot 1982 [7]         | Case-Control | Incidence | H       | SR        | N               | US      | 1978-1979 | Lung           | OR 1.5(0.9-2.4)  | 83/342                          | 6   |
|                       |              |           |         |           |                 |         |           | Adenocarcinoma | OR 1.0(0.4-2.6)  | 53/254                          |     |
|                       |              |           |         |           |                 |         |           | SCLC           | OR 3.2(1.4-7.6)  | 57/241                          |     |
|                       |              |           |         |           |                 |         |           | Squamous       | OR 1.2(0.5-2.5)  | 57/267                          |     |
|                       |              |           |         | Occup (W) |                 |         |           | Lung           | OR 1.3(0.8-2.2)  | 181/342                         |     |
| Bond 1986 [8]         | Nested Case- | Mortality | P       | JEM       | N               | US      | 1940-1980 | Lung           | OR 1.3(0.8-2.2)  | 308/588                         | 7   |

|                           |              |           |   |           |   |             |           |                |                  |             |   |
|---------------------------|--------------|-----------|---|-----------|---|-------------|-----------|----------------|------------------|-------------|---|
|                           | Control      |           |   |           |   |             |           |                |                  |             |   |
| Bouchardy 2002 [9]        | Cohort       | Incidence | - | Occup (W) | N | Switzerland | 1980-1993 | Lung           | OR 0.8(0.7-0.9)  | 236/58134   | 6 |
| Brenner 2010 [10]         | Case-Control | Incidence | P | SR        | Y | Canada      | 1997-2002 | Lung           | OR 1.5(1-2.4)    | 308/771     | 8 |
| Bruske-Hohlfeld 2000 [11] | Case-Control | Incidence | P | Occup (W) | Y | Germany     | 1988-1996 | Lung           | OR 1.4(1.1-1.7)  | 3541/3498   | 7 |
| Buiatti 1985 [12]         | Case-Control | Incidence | H | Occup (W) | Y | Italy       | 1981-1983 | Lung           | OR 0.6(0.3-1.1)  | 376/892     | 7 |
| Burns 1991 [13]           | Case-Control | Incidence | H | Occup (W) | Y | US          | 1980      | Lung           | OR 1.1(0.7-1.8)  | 5935/3956   | 6 |
| Calvert 2012 [14]         | Case-Control | Incidence | H | Occup (C) | N | US          | 1988-2007 | Lung           | OR 1.6(1.5-1.7)  | 13268/97669 | 5 |
| Chatzis 1999 [15]         | Case-Control | Incidence | H | Occup (C) | Y | Greece      | 1987-1988 | Lung           | OR 5.3(0.7-32.2) | 256/458     | 5 |
| Cheng 1987a [16]          | Cohort       | Mortality | - | JEM       | N | China       | 1964-1983 | Lung           | SMR 1.6(0.7-3.2) | 7/649       | 6 |
| Cheng 1987b [16]          | Cohort       | Mortality | - | JEM       | N | China       | 1968-1983 | Lung           | SMR 1.3(0.1-6.1) | 1/162       | 6 |
| Cheng 1987c [16]          | Cohort       | Mortality | - | JEM       | N | China       | 1964-1983 | Lung           | SMR 2.6(0.5-8.2) | 2/105       | 6 |
| Coggon 1986 [17]          | Case-Control | Incidence | H | Occup (W) | N | UK          | 1975-1980 | Lung           | OR 1.7(1-3)      | 738/2214    | 6 |
| Corbin 2011 [18]          | Case-Control | Incidence | P | Occup (W) | Y | New Zealand | 2007-2008 | Lung           | OR 1.4(0.8-2.5)  | 458/796     | 7 |
| De Stefani 1996 [19]      | Case-Control | Incidence | H | SR        | Y | Uruguay     | 1993-1994 | Lung           | OR 1.7(0.9-2.8)  | 270/383     | 7 |
|                           |              |           |   |           |   |             |           | Adenocarcinoma | OR 1.3(0.5-3.2)  | NS/383      |   |
|                           |              |           |   |           |   |             |           | SCLC           | OR 2.0(0.7-5.9)  | NS/383      |   |
|                           |              |           |   |           |   |             |           | Squamous       | OR 2.1(1.1-3.8)  | NS/383      |   |
|                           |              |           |   | Occup (C) |   |             |           | Lung           | OR 1.1(0.5-2.7)  | 270/383     |   |
| De Stefani 2005 [20]      | Case-Control | Incidence | H | SR        | Y | Uruguay     | 1994-2000 | Adenocarcinoma | OR 0.8(0.4-1.5)  | 338/1014    | 7 |
| Dement 2003 [21]          | Cohort       | Incidence | - | Occup (C) | N | US          | 1979-2000 | Lung           | SIR 1.5(1.2-1.7) | 137/13354   | 7 |
| Demers                    | Pooled       | Mortality | - | Occup     | N | US/UK       | 1940-     | Lung           | SMR 0.8(0.7-     | 575/28704   | 7 |

|                          |                            |           |   |              |   |                |               |      |                      |            |   |
|--------------------------|----------------------------|-----------|---|--------------|---|----------------|---------------|------|----------------------|------------|---|
| 1995 [22]                | Cohort                     |           |   | (W)          |   |                | 1984          |      | 0.9)                 |            |   |
| Droste<br>1999 [23]      | Case-<br>Control           | Incidence | H | JEM          | Y | Belgium        | 1995-<br>1997 | Lung | OR 1.5(0.9-2.6)      | 199/257    | 6 |
| Dubrow<br>1984 [24]      | Nested<br>Case-<br>Control | Mortality | - | Occup<br>(C) | N | US             | 1971-<br>1973 | Lung | OR 1.2(0.9-1.6)      | 48/34879   | 5 |
| Elci 2003<br>[25]        | Case-<br>Control           | Incidence | H | Occup<br>(C) | Y | Turkey         | 1979-<br>1984 | Lung | OR 0.8(0.4-1.6)      | 1354/1519  | 6 |
| Enterline<br>1963a [26]  | Cohort                     | Mortality | - | Occup<br>(F) | N | US             | 1950          | Lung | SMR 0.8(0.5-<br>1.2) | 23/?       | 6 |
| Enterline<br>1963b[26]   | Cohort                     | Mortality | - | Occup<br>(C) | N | US             | 1950          | Lung | SMR 1.1(1-1.3)       | 316/?      | 6 |
| Ferreccio<br>2013 [27]   | Case-<br>Control           | Incidence | P | SR           | Y | Chile          | 2007-<br>2010 | Lung | OR 2.5(0.8-7.7)      | 17/135     | 6 |
| Finkelstein<br>1995 [28] | Case-<br>Control           | Mortality | P | Occup<br>(C) | N | Canada         | 1979-<br>1988 | Lung | OR 1.7(1-2.8)        | 576/2219   | 7 |
| Firth 1996<br>[29]       | Cohort                     | Mortality | - | Occup<br>(W) | N | New<br>Zealand | 1972-<br>1984 | Lung | SIR 1.5(1.3-1.7)     | 278/26207  | 6 |
| Gallagher<br>1985 [30]   | Cohort                     | Mortality | - | Occup<br>(W) | N | Canada         | 1950-<br>1979 | Lung | SMR 1.1(0.9-<br>1.2) | 283/457083 | 7 |
| Ganesh<br>2011 [31]      | Case-<br>Control           | Incidence | H | SR           | N | India          | 1997-<br>1999 | Lung | OR 0.9(0.3-3.3)      | 408/1383   | 4 |
| Gottlieb<br>1979 [32]    | Cohort                     | Mortality | - | Occup<br>(W) | N | US             | 1960-<br>1975 | Lung | OR 1.0(0.9-1.2)      | 2805/2805  | 7 |
| Guida 2011<br>[33]       | Case-<br>Control           | Incidence | P | Occup<br>(C) | Y | France         | 2001-<br>2007 | Lung | OR 1.5(1.0-2.1)      | 2241/2770  | 8 |
| Harrington<br>1978 [34]  | Case-<br>Control           | Mortality | P | Occup<br>(W) | N | US             | 1961-<br>1974 | Lung | OR 1.2(0.8-1.6)      | 595/539    | 6 |
| Hoshuyama<br>2006 [35]   | Cohort                     | Mortality | - | JEM          | N | China          | 1980-<br>1993 | Lung | SRR 0.9(0.8-<br>0.9) | 26/90182   | 7 |
| Hosseini<br>2009 [36]    | Case-<br>Control           | Incidence | M | SR           | N | Iran           | 2002-<br>2005 | Lung | OR 1.2(0.5-3.1)      | 242/484    | 6 |
| Hu<br>2002 [37]          | Case-<br>Control           | Incidence | P | SR           | N | Canada         | 1994-<br>1997 | Lung | OR 0.7(0.3-1.8)      | 161/483    | 8 |
| Innos 2000<br>[38]       | Cohort                     | Incidence | - | Occup<br>(F) | N | Estonia        | 1968-<br>1995 | Lung | SIR 1.1(0.9-1.3)     | 105/6786   | 7 |
| Jahn 1999<br>[39]        | Case-<br>Control           | Incidence | P | Occup<br>(W) | Y | Germany        | 1988-<br>1993 | Lung | OR 1.6(0.6-3.8)      | 686/712    | 5 |
| Jarvholm                 | Case-                      | Incidence | P | SR           | N | Sweden         | 1983-         | Lung | OR 0.6(0.3-1.5)      | 147/131    | 5 |

|                          |                            |           |   |              |   |           |               |                |                      |            |   |
|--------------------------|----------------------------|-----------|---|--------------|---|-----------|---------------|----------------|----------------------|------------|---|
| 1993 [40]                | Control                    |           |   |              |   |           | 1984          |                |                      |            |   |
| Jayaprakash<br>2008 [41] | Case-<br>Control           | Incidence | H | SR           | N | US        | 1982-<br>1998 | Lung           | OR 1.7(1.2-2.4)      | 651/1260   | 7 |
|                          |                            |           |   |              |   |           |               | Adenocarcinoma | OR 1.4(1.0-1.9)      | 205/1260   |   |
|                          |                            |           |   |              |   |           |               | LCLC           | OR 1.4(0.9-2.2)      | 77/1260    |   |
|                          |                            |           |   |              |   |           |               | SCLC           | OR 1.2(0.8-1.8)      | 97/1260    |   |
|                          |                            |           |   |              |   |           |               | Squamous       | OR 1.9(1.2-3.2)      | 209/1260   |   |
| Kauppinen<br>1993 [42]   | Nested<br>Case-<br>Control | Incidence | P | JEM          | Y | Finland   | 1957-<br>1982 | Lung           | OR 0.4(0.2-1.1)      | 117/408    | 8 |
| Kjuus<br>1986 [43]       | Case-<br>Control           | Incidence | H | SR           | Y | Norway    | 1979-<br>1983 | Lung           | OR 0.4(0.2-0.8)      | 176/176    | 7 |
| Kromhout<br>1992 [44]    | Cohort                     | Incidence | - | JEM          | Y | Holland   | 1960-<br>1985 | Lung           | HR 1.6(0.7-3.4)      | 69/856     | 8 |
| Leigh 1996<br>[45]       | Cohort                     | Mortality | - | Occup<br>(W) | N | US        | 1979-<br>1984 | Lung           | SMR 0.9(0.5-<br>1.3) | ?/173438   | 5 |
| Lerchen<br>1987 [46]     | Case-<br>Control           | Incidence | P | SR           | Y | US        | 1980-<br>1982 | Lung           | OR 0.8(0.3-1.7)      | 333/501    | 5 |
| Levin<br>1988 [47]       | Case-<br>Control           | Incidence | P | SR           | Y | China     | 1984-<br>1985 | Lung           | OR 1.7(1-2.7)        | 269/308    | 6 |
|                          |                            |           |   | Occup<br>(W) |   |           |               | Lung           | OR 1.2(0.7-2.2)      | 733/760    |   |
| Lipscomb<br>1998 [48]    | Cohort                     | Incidence | - | Occup<br>(C) | N | US        | 1989-<br>1992 | Lung           | SIR 1.3(0.7-1.9)     | 13/10938   | 6 |
| Lqman<br>2014 [49]       | Case-<br>Control           | Incidence | H | SR           | N | Pakistan  | 2010-<br>2013 | Lung           | OR 1.9(1.2-3.1)      | 400/800    | 4 |
| MacArthur<br>2009 [50]   | Case-<br>Control           | Incidence | H | Occup<br>(W) | Y | Canada    | 1983-<br>1990 | Lung           | OR 0.8(0.7-1.0)      | 2964/10223 | 5 |
| Matos 2000<br>[51]       | Case-<br>control           | Incidence | P | Occup<br>(W) | Y | Argentina | 1994-<br>1996 | Lung           | OR 0.7(0.3-1.5)      | 200/397    | 6 |
| Mconnell<br>1952 [52]    | Case-<br>Control           | Incidence | H | SR           | N | England   | 1946-<br>1950 | Lung           | OR 1.8(0.6-5.4)      | 100/200    | 4 |
| Menck 1976<br>[53]       | Cohort                     | Mortality | - | Occup<br>(W) |   | US        | 1968-<br>1973 | Lung           | SMR 1.1(0.8-<br>1.5) | 39/3938    | 5 |
| Mikoczy<br>1996 [54]     | Nested<br>Case-<br>Control | Incidence | P | JEM          | N | Sweden    | 1958-<br>1959 | Lung           | OR 0.3(0-6.7)        | 22/55      | 7 |
| Milne 1983               | Cohort                     | Mortality | - | Occup        | N | US        | 1958-         | Lung           | SMR 1.3(0.7-         | 925/6420   | 5 |

|                       |              |           |   |           |   |                           |           |                |                  |                |   |
|-----------------------|--------------|-----------|---|-----------|---|---------------------------|-----------|----------------|------------------|----------------|---|
| [55]                  |              |           |   | (W)       |   |                           | 1962      |                | 2.6)             |                |   |
| Muscat 1998 [56]      | Case-Control | Incidence | H | SR        | Y | US                        | 1978-1992 | Lung           | OR 1.6(0.8-3.2)  | 365/251        | 6 |
| Notani 1993 [57]      | Case-Control | Incidence | H | Occup (W) | Y | India                     | 1986-1990 | Lung           | OR 2.9(0.9-9.6)  | 246/212        | 6 |
| Osann 2000 [58]       | Case-Control | Incidence | P | SR        | Y | US                        | 1990-1993 | SCLC           | OR 0.8(0.3-2.4)  | 98/204         | 8 |
| Peters 2012 [59]      | Case-Control | Incidence | H | Occup (W) | Y | Multiple                  | 1985-2005 | Lung           | OR 1.2(1.1-1.3)  | 13479/16510    | 7 |
| Pezzotto 1999 [60]    | Case-Control | Incidence | H | Occup (C) | Y | Argentina                 | 1992-1997 | Lung           | OR 0.9(0.3-2.7)  | 367/586        | 5 |
| Pronk 2009 [61]       | Cohort       | Incidence | - | Occup (C) | Y | China                     | 1996-2000 | Lung           | RR 2.3(1.1-4.7)  | 8/71067        | 8 |
| Pukkala 2009 [62]     | Cohort       | Incidence | - | Occup (W) | N | Nordic Countries          | 1961-2005 | Lung           | SIR 1(0.9-1)     | 10941/15mil    | 7 |
| Richiardi 2004 [63]   | Case-Control | Incidence | P | Occup (C) | Y | Italy                     | 1990-1992 | Lung           | OR 0.9(0.6-1.5)  | 956/1253       | 6 |
| Robinson 1995 [64]    | Cohort       | Mortality | - | Occup (C) | N | US                        | 1984-1986 | Lung           | SMR 1.2(1.1-1.2) | 1489/876731    | 6 |
| Robinson 1996 [65]    | Cohort       | Mortality | - | Occup (C) | N | US                        | 1987-1990 | Lung           | SMR 1.1(0.9-1.2) | 2648/27362     | 7 |
| Ronco 1988 [66]       | Case-Control | Mortality | P | Occup (W) | Y | Italy                     | 1976-1980 | Lung           | OR 2.8(0.9-8.4)  | 164/492        | 8 |
| Schraub 1989 [67]     | Case-Control | Incidence | P | SR        | N | France                    | 1978-1985 | Adenocarcinoma | OR 1.1(0.4-2.5)  | 53/160         | 5 |
| Siemiatycki 1991 [68] | Case-Control | Incidence | H | O         | Y | Canada                    | 1979-1983 | Lung           | OR 1.2(1.0-1.5)  | 174/NS Exposed | 7 |
| Siew 2012 [69]        | Cohort       | Incidence | - | JEM       | Y | Finland                   | 1971-1995 | Lung           | RR 0.9(0.9-1.0)  | 2750/1.2mil    | 8 |
| Simpson 1999 [70]     | Cohort       | Incidence | - | Occup (C) | N | UK                        | 1971-1990 | Lung           | RR 1.9(1.4-2.6)  | 50/381915      | 7 |
| Smailyte 2012 [71]    | Cohort       | Incidence | - | Occup (W) | N | Lithuania                 | 1978-2007 | Lung           | SIR 0.9(0.6-1.2) | 36/1518        | 6 |
| Stellman 1984 [72]    | Cohort       | Mortality | - | Occup (W) | N | US                        | 1959-1972 | Lung           | SMR 1.1(1-1.3)   | 135/417120     | 5 |
| Stellman 1998 [73]    | Cohort       | Mortality | - | SR        | Y | US, Columbia, Puerto Rico | 1982-1988 | Lung           | IDR 1.2(1.0-1.3) | 317/315,266    | 7 |
|                       |              |           |   | Occup     |   |                           |           | Lung           | RR 1.1(0.9-1.4)  | 111/315266     |   |

|                               |                     |           |   |           |   |             |           |                |                  |               |   |
|-------------------------------|---------------------|-----------|---|-----------|---|-------------|-----------|----------------|------------------|---------------|---|
|                               |                     |           |   | (W)       |   |             |           |                |                  |               |   |
| Swanson 1982 [74]             | Cohort              | Incidence |   | Occup (W) | N | US          | 1970-1978 | Lung           | SMR 1.6(0.8-2.7) | 11/1070       | 6 |
| Szadkowska-Stanczyk 2001 [75] | Nested Case-Control | Mortality | P | JEM       | Y | Poland      | 1968-1995 | Lung           | OR 2.1(0.9-4.9)  | 79/237        | 7 |
| Tse 2012 [76]                 | Case-Control        | Incidence | P | SR        | Y | China       | 2004-2006 | Lung           | OR 1.2(0.6-2.2)  | 1208/1069     | 7 |
|                               |                     |           |   |           |   |             |           | Adenocarcinoma | OR 1.7(0.8-3.6)  | 440/1069      |   |
|                               |                     |           |   |           |   |             |           | Squamous/SCLC  | OR 1.6(0.7-4)    | 490/1069      |   |
| Versluys 1949 [77]            | Cohort              | Mortality | - | Occup (C) | N | Netherlands | 1931-1935 | Lung           | SMR 0.9(0.7-1.3) | 35/51124      | 6 |
| Wang 1995 [78]                | Case-Control        | Incidence | H | Occup (W) | N | China       | 1981-1987 | Lung           | OR 1.2(1.0-1.6)  | 4806/14685    | 6 |
| Weston 1998 [79]              | Cohort              | Mortality | - | O         | N | Canada      | 1971-1991 | Lung           | RR 1.3(0.7-2.6)  | 9/52,390      | 6 |
| Wu 1995 [80]                  | Case-Control        | Incidence | H | O         | Y | US          | ?-1995    | Lung           | OR 3.5(1.4-8.6)  | 180/270       | 7 |
|                               |                     |           |   |           |   |             |           | Non-SCLC       | OR 2.4(1.3-4.4)  | 180/270       |   |
|                               |                     |           |   |           |   |             |           | SCLC           | OR 0.2(0.0-4.1)  | 180/270       |   |
|                               |                     |           |   | Occup (W) |   |             |           | Lung           | OR 2.5(0.4-6.1)  | 180/270       |   |
| Wu-Williams 1993 [81]         | Case-Control        | Incidence | P | SR        | Y | China       | 1985-1987 | Lung           | OR 1.1(0.8-1.7)  | 966/960       | 6 |
|                               |                     |           |   | Occup (W) |   |             |           | Lung           | OR 0.9(0.5-1.7)  | 966/960       |   |
| Wunsch-Filho 1998 [82]        | Case-Control        | Incidence | H | Occup (W) | Y | Brazil      | 1990-1991 | Lung           | OR 1.4(0.7-2.8)  | 398/860       | 5 |
| Yang 1996 [83]                | Nested Case-Control | Mortality | P | JEM       | Y | China       | 1972-1992 | Lung           | OR 1.1(0.5-2.8)  | 21/75 Exposed | 8 |
| Yang 1997 [84]                | Cohort              | Mortality | - | JEM       | Y | China       | 1972-1992 | Lung           | SMR 2.6(1.6-4.1) | 20/2362       | 6 |
| Zahm 1989 [85]                | Case-Control        | Incidence | H | Occup (C) | Y | US          | 1980-1985 | Lung           | OR 1.3(1-1.7)    | 4431/11326    | 7 |
| Zahm 1989                     | Case-               | Incidence | H | Occup     | Y | US          | 1980-     | Lung           | OR 1.3(0.5-3.3)  | 4431/11326    | 7 |

|      |         |  |  |     |  |  |      |  |  |  |  |
|------|---------|--|--|-----|--|--|------|--|--|--|--|
| [85] | Control |  |  | (F) |  |  | 1985 |  |  |  |  |
|------|---------|--|--|-----|--|--|------|--|--|--|--|

H=Hospital; P=Populations; SR=Self-Reported - Wood Dust Exposure; JEM=Job-Exposure Matrix - Wood Dust Exposure; Occup=Wood-Dust Related Occupation (W = Woodworker; F = Furniture; C = Carpenter); O=Other Wood Dust Exposure; SCLC= Small-cell lung carcinoma; LCLC=Large-cell lung carcinoma; OR=odds ratio; IDR=Incidence Density Ratio, HR=Hazard Ratio; RR=Risk Ratio; SMR=Standardised Mortality Ratio; SRR=Standardised Rate Ratio; SIR=Standardised Incidence Ratio; NOS=Newcastle-Ottawa Scale score. Recalculated odds-ratio not controlled for smoking.

**Supplementary Table 2.** Summary of studies that met the inclusion criteria but were not included in the meta-analysis with justifications for their exclusion

| Author Date [Ref]            | Study        | Reason for Exclusion                                          | Summary of Findings                                                                                                                                                                                                                                                                  |
|------------------------------|--------------|---------------------------------------------------------------|--------------------------------------------------------------------------------------------------------------------------------------------------------------------------------------------------------------------------------------------------------------------------------------|
| Acheson 1984 [86]            | Cohort       | Used in Pooled Cohort of Demers 1995 [22]                     | Significant association between wood dust-related occupation and a reduced risk of lung cancer (SMR 0.8, 95% CI 0.7-0.9) - UK                                                                                                                                                        |
| Andersson 1999 [87]          | Cohort       | Same Cohort as Pukkalla 2009 [62]                             | No significant association between wood dust-related occupation and lung cancer (Denmark = SIR 1.0, 95% CI 1.0-1.1); Significant increased risk (Finland = SIR 1.1, 95% CI 1.1-1.2); Significant reduced risk (Norway = SIR 0.8, 95% CI 0.8-0.9; Sweden = SIR 0.7, 95% CI 0.7-0.7) - |
| Andersson 2001 [88]          | Cohort       | Same Cohort as Pukkalla 2009 [62]                             | No significant association between wood dust-related occupation and lung cancer (SMR 1.3, 95% CI 0.6-3.1) - Sweden                                                                                                                                                                   |
| Andersson 2010 [89]          | Cohort       | Same Cohort as Pukkalla 2009 [62]                             | Significant association between wood dust-related occupation and a reduced risk of lung cancer (SMR 0.7, 95% CI 0.4-1.0) - Sweden                                                                                                                                                    |
| Andersson 2013 [90]          | Cohort       | Same Cohort as Pukkalla 2009 [62]                             | Significant association between wood dust-related occupation and a reduced risk for lung cancer (SIR 0.6, 95% CI 0.3-0.9) - Sweden                                                                                                                                                   |
| Baccarelli 2005 [91]         | Case-Control | Same Cohort as Baccarelli 2006 [91]                           | Mixed association between wood dust-related occupation and an increased risk for lung cancer (Wood Industry = OR 9.3, 95% CI 2.0-42.8; Carpenters = OR 1.2, 95% CI 0.3-4.2) - Russia                                                                                                 |
| Bardin-Mikolajczak 2007 [92] | Case-Control | Same Cohort as Peters 2012 [59]                               | Significant association between wood dust-related occupation and an increased risk for lung cancer (OR 7.5, 95% CI 1.5-39.9) - Czech Republic, Hungary, Poland, Romania, Russia, Slovakia                                                                                            |
| Blair 1985 [93]              | Cohort       | Used in Pooled Cohort of Demers 1995 [22]                     | No significant association between wood dust-related occupation and lung cancer (SMR 1.0, 95% CI 0.7-1.3) - US                                                                                                                                                                       |
| Blair 1990 [94]              | Cohort       | Used in Pooled Cohort of Demers 1995 [22]                     | No significant association between wood dust-related occupation and lung cancer (SMR 1.5, 95% CI 0.8-2.4) - US                                                                                                                                                                       |
| Carpenter 1999 [95]          | Cohort       | Same Cohort as Simpson 1999 [70]                              | Significant association between wood dust related occupation and an increased risk for lung cancer (PRR 1.71, 95% CI 1.05-2.66) - UK                                                                                                                                                 |
| Carstensen 1988 [96]         | Cohort       | Same Cohort as Pukkalla 2009 [62]                             | No significant association between wood dust-related occupation and lung cancer (OR 1.0, 95% CI 0.9-1.1) - Sweden                                                                                                                                                                    |
| Consonni 2010 [97]           | Case-Control | Same Cohort as Peters 2012 [59]                               | No significant association between wood dust-related occupation and lung cancer (OR 1.0, 95% CI 0.6-1.5) - Italy                                                                                                                                                                     |
| Correa 1984 [98]             | Case-Control | No data for 95% Confidence Interval                           | Significant association between wood dust and an increased risk for lung cancer (OR 1.4) in Louisiana, US                                                                                                                                                                            |
| Demers 1998 [99]             | Cohort       | Duplicate - see Demers 1995 [22]                              | -                                                                                                                                                                                                                                                                                    |
| Etzel 2008 [100]             | Case-Control | Same Cohort as Barcnas 2005 [4] - Less Specific for Wood Dust | Significant association between wood dust and an increased risk for lung cancer (OR 1.5, 95% CI 1.1-2.1)                                                                                                                                                                             |
| Gerhardsson 1985 [101]       | Cohort       | Same Cohort as Pukkalla 2009 [62]                             | No significant association between wood dust-related occupation and lung cancer (SIR 0.9, 95% CI 0.7-1.2) - Sweden                                                                                                                                                                   |
| Gorlova 2006 [102]           | Case-Control | Same Cohort as Barcnas 2005 [4] - Less Specific to Wood Dust  | Significant association between wood dust and an increased risk for lung cancer in non-smokers (OR 2.6, 95% 1.1-6.4)                                                                                                                                                                 |
| Haldorsen 2004               | Cohort       | Same Cohort as Pukkalla 2009                                  | Significant association between wood dust-related occupation and an increased risk of lung cancer                                                                                                                                                                                    |



|                      |              |                                                                |                                                                                                                                                                                                                                     |
|----------------------|--------------|----------------------------------------------------------------|-------------------------------------------------------------------------------------------------------------------------------------------------------------------------------------------------------------------------------------|
| [103]                |              | [62]                                                           | (SIR 1.3, 95% CI 1.2-1.3) - Norway                                                                                                                                                                                                  |
| Hall 1991 [104]      | Cohort       | Same Cohort as Dement 2003 [21]                                | No significant association between wood dust-related occupation and lung cancer (SIR 2.5, 95% CI 0.9-6) - US                                                                                                                        |
| Jappinen 1989 [105]  | Cohort       | Same Cohort as Pukkalla 2009 [62]                              | No significant association between wood dust-related occupation and lung cancer (SIR 1.0, 95% CI 0.6-1.4) - Finland                                                                                                                 |
| Ji 2005 [106]        | Cohort       | Same Cohort as Pukkalla 2009 [62]                              | No significant association between wood dust-related occupation and lung cancer (SIR 0.8, 95% CI 0.7-0.8) - Sweden                                                                                                                  |
| Jockel 1992 [107]    | Case-Control | Same Cohort as Bruske-Hohlfeld 2000 [11]                       | No significant association between wood dust-related occupation and lung cancer (OR 0.7, 95% CI 0.3-1.9) - Germany                                                                                                                  |
| Jockel 1998 [108]    | Case-Control | Same Cohort as Bruske-Hohlfeld 2000 [11]                       | No significant association between wood dust-related occupation and lung cancer (OR 1.3, 95% CI 0.9-1.8) - Germany                                                                                                                  |
| Kauppinen 1986 [109] | Case-Control | Same Cohort as Kauppinen 1993 [42] - Earlier Study             | No significant association between wood dust and lung cancer (OR 1.68)                                                                                                                                                              |
| Kawachi 1989 [110]   | Case-Control | Same Cohort as Firth 1996 [29]                                 | Significant association between wood dust-related occupation and an increased risk of lung cancer (OR 1.3, 95% CI 1.2-1.6) - New Zealand                                                                                            |
| Kreuzer 1999 [111]   | Case-Control | Same Cohort as Bruske-Hohlfeld 2000 [11]                       | Significant association between wood dust-related occupation and an increased risk of lung cancer (OR 1.3, 95% CI 1.1-1.6) - Germany                                                                                                |
| Kreuzer 2002 [112]   | Case-Control | Same Cohort as Bruske-Hohlfeld 2000 [11]                       | Significant association between wood dust-related occupation and an increased risk of lung cancer (OR 13.4, 95% CI 1.6-112.2) - Germany                                                                                             |
| Kvale 1986 [113]     | Cohort       | Same Cohort as Pukkalla 2009 [62]                              | No significant association between wood dust-related occupation and lung cancer (SIR 1.6, 95% CI 0.9-2.8) - Norway                                                                                                                  |
| Laakkonen 2006 [114] | Cohort       | Same Cohort as Siew 2012 [69] - Earlier study                  | No significant association between wood dust and lung cancer in low (SIR 1.1, 95% CI 1.0-1.2) medium (SIR 1.0, 95% CI 1.0-1.0) and high (SIR 0.9, 95% CI 0.7-1.0) exposure categories in Finnish males. Similar results for females |
| Laakkonen 2008 [115] | Cohort       | Duplicate - See Laakkonen 2006 [114]                           | -                                                                                                                                                                                                                                   |
| Matos 1998 [116]     | Case-control | Duplicate - see Matos 2000 [51]                                | -                                                                                                                                                                                                                                   |
| Mchugh 2010 [117]    | Case-Control | Same Cohort as Barcenas 2005 [4] - Subset of Mexican-Americans | No significant association between wood dust and lung cancer (OR 1.3, 95% CI 0.9-2.1)                                                                                                                                               |
| Miller 1989 [118]    | Cohort       | Used in Pooled Cohort of Demers 1995 [22]                      | No significant association between wood dust-related occupation and lung cancer (SMR 0.9, 95% CI 0.6-1.2) - US                                                                                                                      |
| Miller 1994 [119]    | Cohort       | Used in Pooled Cohort of Demers 1995 [22]                      | No significant association between wood dust-related occupation and lung cancer (SMR 1.0, 95% CI 0.8-1.1) - US                                                                                                                      |
| Morabia 1992 [120]   | Case-Control | No data for 95% Confidence Interval                            | No significant association between wood occupation and lung cancer (OR 1.4)                                                                                                                                                         |
| Olsen 1979 [121]     | Cohort       | Same Cohort as Pukkalla 2009 [62]                              | No significant association between wood dust-related occupation and lung cancer (SMR 0.9, 95% CI 0.6-1.5) - Denmark                                                                                                                 |

|                          |              |                                                                |                                                                                                                                                                                                                      |
|--------------------------|--------------|----------------------------------------------------------------|----------------------------------------------------------------------------------------------------------------------------------------------------------------------------------------------------------------------|
| Olsen 1979 [122]         | Cohort       | Same Cohort as Pukkalla 2009 [62]                              | No significant association between wood dust-related occupation and lung cancer (SMR 1.1, 95% CI 0.9-1.3) - Denmark                                                                                                  |
| Olsen 1987 [123]         | Cohort       | Same Cohort as Pukkalla 2009 [62]                              | No significant association between wood dust-related occupation and lung cancer (Woodworker = SIR 0.9, 95% CI 0.8-1.1; Carpenter = SIR 1.1, 95% CI 0.9-1.3) - Denmark                                                |
| Olsen 1988 [124]         | Cohort       | Same Cohort as Pukkalla 2009 [62]                              | No significant association between wood dust-related occupation and lung cancer (Processing = SIR 0.9, 95% CI 0.7-1.1; Manufacture = SIR 1.0, 95% CI 0.9-1.1) - Denmark                                              |
| Pohlabeln 2000 [125]     | Case-Control | Same Cohort as Peters 2012 [59]                                | No significant association between wood dust-related occupation and lung cancer (OR 0.6, 95% CI 0.3-1.0) - Germany/Italy/Portugal/UK/France/Spain/Sweden                                                             |
| Pukkala 1983 [126]       | Cohort       | Same Cohort as Pukkalla 2009 [62]                              | Significant association between wood dust-related occupation and an increased risk of lung cancer (SIR 1.3, 95% CI 1.2-1.4) - Finland                                                                                |
| Rang 1981 [127]          | Cohort       | Overlap with Pooled Cohort of Demers 1995 [22]                 | No significant association between wood dust-related occupation and lung cancer (SMR 0.8, 95% CI 0.6-1.1) - UK                                                                                                       |
| Robinson 1986 [65]       | Cohort       | Used in Pooled Cohort of Demers 1995 [22]                      | No significant association between wood dust-related occupation and lung cancer (SMR 0.8, 95% CI 0.6-1.1) - US                                                                                                       |
| Roscoe 1992 [128]        | Cohort       | Used in Pooled Cohort of Demers 1995 [22]                      | No significant association between wood dust-related occupation and lung cancer (SMR 1, 95% CI 0.8-1.3) - US                                                                                                         |
| Sankila 1990 [129]       | Cohort       | Same Cohort as Pukkalla 2009 [62]                              | Significant association between wood dust-related occupation and an increased risk of lung cancer (Carpenters = SIR 1.3, 95% CI 1.2-1.4); No significant association (Woodworkers = SIR 1.3, 95% CI 0.8-2) - Finland |
| Schabath 2005 [130]      | Case-Control | Same Cohort as Barcenas 2005 [4] - Less Specific for Wood Dust | Significant association between wood dust and an increased risk for lung cancer (OR 1.7, 95% CI 1.3-2.1)                                                                                                             |
| Schoenberg 1987 [131]    | Case-Control | No data for 95% Confidence Interval                            | No Significant association between wood dust and lung cancer (Carpenters or Furniture = OR 0.9-1) - US                                                                                                               |
| Siemiatycki 1986 [132]   | Case-Control | Duplicate - see Siemiatycki 1991 [68]                          | -                                                                                                                                                                                                                    |
| Siemiatycki 1990 [133]   | Case-Control | Duplicate - see Siemiatycki 1991 [68]                          | -                                                                                                                                                                                                                    |
| Spitz 2007 [134]         | Case-Control | Same Cohort as Barcenas 2005 [4] - Less Specific for Wood Dust | No significant association between wood dust and lung cancer for never smokers (OR 0.9, 95% CI 0.5-1.7), former smokers (OR 1.2, 95% CI 0.9-1.7), and current smokers (OR 1.2, 95% CI 0.9-1.6)                       |
| Tse 2011 [135]           | Case-Control | Same Cohort as Tse 2012 [76] - Subset of non-smokers           | No significant association between wood dust and lung cancer (OR 1.4, 95% CI 0.3-7.6) or lung adenocarcinomas (OR 2.2, 95% CI 0.4-12.0)                                                                              |
| Wang 1999 [136]          | Cohort       | No data for 95% Confidence Interval                            | Association between wood dust-related occupation and lung cancer (SMR 1.19)                                                                                                                                          |
| Yang 1996 [137]          | Cohort       | Duplicate - see Yang 1997 [84]                                 |                                                                                                                                                                                                                      |
| Yenugadhathi 2009a [138] | Case-Control | Same Cohort as MacArthur 2009 [50]                             | No significant association between wood dust-related occupation and lung cancer (OR 1.3, 95% CI 1.0-1.8) - Canada                                                                                                    |
| Yenugadhathi 2009b       | Case-        | Same Cohort as MacArthur                                       | No significant association between wood dust-related occupation and lung cancer (OR 0.9, 95% CI                                                                                                                      |

|                 |                  |                                 |                                                                                                                                                                           |
|-----------------|------------------|---------------------------------|---------------------------------------------------------------------------------------------------------------------------------------------------------------------------|
| [139]           | Control          | 2009 [50]                       | 0.8-1.1) - Canada                                                                                                                                                         |
| Zeka 2006 [140] | Case-<br>Control | Same Cohort as Peters 2012 [59] | No significant association between wood dust-related occupation and lung cancer (OR 0.7, 95% CI 0.3-2.2) - Czech Republic, Hungary, Poland, Romania, Russia, Slovakia, UK |

## REFERENCES

1. Arias Bahia SH, Echenique Mattos I, and Koifman S. Cancer and wood-related occupational exposure in the Amazon region of Brazil. *Environ Res* 99(1):132-40, 2005.
2. Baccarelli A, Khmel'nitskii O, Tretiakova M, Gorbanev S, Lomtev A, Klimkina I, Tchibissoy V, Averkina O, Rice C, and Dosemeci M. Risk of lung cancer from exposure to dusts and fibers in Leningrad Province, Russia. *Am J Ind Med* 49(6):460-7, 2006.
3. Baker JA, McCann SE, Reid ME, Nowell S, Beehler GP, and Moysich KB. Associations between black tea and coffee consumption and risk of lung cancer among current and former smokers. *Nutr Cancer* 52(1):15-21, 2005.
4. Barcenas CH, Delclos GL, El-Zein R, Tortolero-Luna G, Whitehead LW, and Spitz MR. Wood dust exposure and the association with lung cancer risk. *Am J Ind Med* 47(4):349-57, 2005.
5. Barthel E and Dietrich M. Retrospective cohort study of cancer morbidity in furniture makers exposed to wood dust. *Z Gesamte Hyg* 35(5):279-81, 1989.
6. Bhatti P, Newcomer L, Onstad L, Teschke K, Camp J, Morgan M, and Vaughan TL. Wood dust exposure and risk of lung cancer. *Occup Environ Med* 68(8):599-604, 2011.
7. Blot WJ, Davies JE, Brown LM, Nordwall CW, Buiatti E, Ng A, and Fraumeni JF, Jr. Occupation and the high risk of lung cancer in Northeast Florida. *Cancer* 50(2):364-71, 1982.
8. Bond GG, Flores GH, Shellenberger RJ, Cartmill JB, Fishbeck WA, and Cook RR. Nested case-control study of lung cancer among chemical workers. *Am J Epidemiol* 124(1):53-66, 1986.
9. Bouchardy C, Schuler G, Minder C, Hotz P, Bousquet A, Levi F, Fisch T, Torhorst J, and Raymond L. Cancer risk by occupation and socioeconomic group among men--a study by the Association of Swiss Cancer Registries. *Scand J Work Environ Health* 28 Suppl 1:1-88, 2002.
10. Brenner DR, Hung RJ, Tsao MS, Shepherd FA, Johnston MR, Narod S, Rubenstein W, and McLaughlin JR. Lung cancer risk in never-smokers: a population-based case-control study of epidemiologic risk factors. *BMC Cancer* 10:285, 2010.
11. Bruske-Hohlfeld I, Mohner M, Pohlabeln H, Ahrens W, Bolm-Audorff U, Kreienbrock L, Kreuzer M, Jahn I, Wichmann HE, and Jockel KH. Occupational lung cancer risk for men in Germany: results from a pooled case-control study. *Am J Epidemiol* 151(4):384-95, 2000.
12. Buiatti E, Kriebel D, Geddes M, Santucci M, and Pucci N. A case control study of lung cancer in Florence, Italy. I. Occupational risk factors. *J Epidemiol Community Health* 39(3):244-50, 1985.
13. Burns PB and Swanson GM. The Occupational Cancer Incidence Surveillance Study (OCISS): risk of lung cancer by usual occupation and industry in the Detroit metropolitan area. *Am J Ind Med* 19(5):655-71, 1991.
14. Calvert GM, Luckhaupt S, Lee SJ, Cress R, Schumacher P, Shen R, Tak S, and Deapen D. Lung cancer risk among construction workers in California, 1988-2007. *Am J Ind Med* 55(5):412-22, 2012.
15. Chatzis C, Danaka G, Linos A, Kales SN, and Christiani DC. Lung cancer and occupational risk factors in Greece. *J Occup Environ Med* 41(1):29-35, 1999.
16. Cheng W, Zuo H, and Hao Z. [Cancer mortality among woodworkers in Tianjin]. *Chinese Journal of Industrial Hygiene and Occupational Diseases* 5(1):22-5, 1987.
17. Coggon D, Pannett B, Osmond C, and Acheson ED. A survey of cancer and occupation in young and middle aged men. I. Cancers of the respiratory tract. *Br J Ind Med* 43(5):332-8, 1986.

18. Corbin M, McLean D, Mannetje A, Dryson E, Walls C, McKenzie F, Maule M, Cheng S, Cunningham C, Kromhout H, Blair A, and Pearce N. Lung cancer and occupation: A New Zealand cancer registry-based case-control study. *Am J Ind Med* 54(2):89-101, 2011.
19. De Stefani E, Kogevinas M, Boffetta P, Ronco A, and Mendilaharsu M. Occupation and the risk of lung cancer in Uruguay. *Scand J Work Environ Health* 22(5):346-52, 1996.
20. De Stefani E, Boffetta P, Brennan P, Deneo-Pellegrini H, Ronco A, and Gutierrez LP. Occupational exposures and risk of adenocarcinoma of the lung in Uruguay. *Cancer Causes Control* 16(7):851-6, 2005.
21. Dement J, Pompeii L, Lipkus IM, and Samsa GP. Cancer incidence among union carpenters in New Jersey. *J Occup Environ Med* 45(10):1059-67, 2003.
22. Demers PA, Boffetta P, Kogevinas M, Blair A, Miller BA, Robinson CF, Roscoe RJ, Winter PD, Colin D, Matos E, and Vainio H. Pooled reanalysis of cancer mortality among five cohorts of workers in wood-related industries. *Scand J Work Environ Health* 21(3):179-90, 1995.
23. Droste JH, Weyler JJ, Van Meerbeeck JP, Vermeire PA, and van Sprundel MP. Occupational risk factors of lung cancer: a hospital based case-control study. *Occup Environ Med* 56(5):322-7, 1999.
24. Dubrow R and Wegman DH. Cancer and occupation in Massachusetts: a death certificate study. *Am J Ind Med* 6(3):207-30, 1984.
25. Elci OC, Akpınar-Elci M, Alavanja M, and Dosemeci M. Occupation and the risk of lung cancer by histologic types and morphologic distribution: a case control study in Turkey. *Monaldi Arch Chest Dis* 59(3):183-8, 2003.
26. Enterline PEPD and McKiever MFBA. Differential Mortality from Lung Cancer by Occupation. *Journal of Occupational Medicine* 5(6):283-290, 1963.
27. Ferreccio C, Yuan Y, Calle J, Benitez H, Parra RL, Acevedo J, Smith AH, Liaw J, and Steinmaus C. Arsenic, tobacco smoke, and occupation: associations of multiple agents with lung and bladder cancer. *Epidemiology* 24(6):898-905, 2013.
28. Finkelstein MM. Occupational associations with lung cancer in two Ontario cities. *Am J Ind Med* 27(1):127-36, 1995.
29. Firth HM, Cooke KR, and Herbison GP. Male cancer incidence by occupation: New Zealand, 1972-1984. *Int J Epidemiol* 25(1):14-21, 1996.
30. Gallagher RP, Threlfall WJ, Band PR, and Spinelli JJ. Cancer mortality experience of woodworkers, loggers, fishermen, farmers, and miners in British Columbia. *Natl Cancer Inst Monogr* 69:163-7, 1985.
31. Ganesh B, Sushama S, Monika S, and Suvarna P. A case-control study of risk factors for lung cancer in Mumbai, India. *Asian Pac J Cancer Prev* 12(2):357-62, 2011.
32. Gottlieb MS, Pickle LW, Blot WJ, and Fraumeni JF, Jr. Lung cancer in Louisiana: death certificate analysis. *J Natl Cancer Inst* 63(5):1131-7, 1979.
33. Guida F, Papadopoulos A, Menvielle G, Matrat M, Fevotte J, Cenee S, Cyr D, Schmaus A, Carton M, Paget-Bailly S, Radoi L, Tarnaud C, Bara S, Tretarre B, Luce D, and Stucker I. Risk of lung cancer and occupational history: results of a French population-based case-control study, the ICARE study. *J Occup Environ Med* 53(9):1068-77, 2011.
34. Harrington JM, Blot WJ, Hoover RN, Housworth WJ, Heath CW, Jr., and Fraumeni JF, Jr. Lung cancer in coastal Georgia: a death certificate analysis of occupation: brief communication. *J Natl Cancer Inst* 60(2):295-8, 1978.
35. Hoshuyama T, Pan G, Tanaka C, Feng Y, Yu L, Liu T, Liu L, Hanaoka T, and Takahashi K. Mortality of iron-steel workers in Anshan, China: a retrospective cohort study. *Int J Occup Environ Health* 12(3):193-202, 2006.
36. Hosseini M, Naghan PA, Karimi S, SeyedAlinaghi S, Bahadori M, Khodadad K, Mohammadi F, Kaynama K, and Masjedi MR. Environmental risk factors for lung cancer in Iran: a case-control study. *Int J Epidemiol* 38(4):989-96, 2009.
37. Hu J, Mao Y, Dryer D, White K, and Canadian Cancer Registries Epidemiology Research Group. Risk factors for lung cancer among Canadian women who have never smoked. *Cancer Detect Prev* 26(2):129-38, 2002.

38. Innos K, Rahu M, Rahu K, Lang I, and Leon DA. Wood dust exposure and cancer incidence: a retrospective cohort study of furniture workers in Estonia. *Am J Ind Med* 37(5):501-11, 2000.
39. Jahn I, Ahrens W, Bruske-Hohlfeld I, Kreuzer M, Mohner M, Pohlabein H, Wichmann HE, and Jockel KH. Occupational risk factors for lung cancer in women: results of a case-control study in Germany. *Am J Ind Med* 36(1):90-100, 1999.
40. Jarvholm B, Larsson S, Hagberg S, Olling S, Ryd W, and Toren K. Quantitative importance of asbestos as a cause of lung cancer in a Swedish industrial city: a case-referent study. *Eur Respir J* 6(9):1271-5, 1993.
41. Jayaprakash V, Natarajan KK, Moysich KB, Rigual NR, Ramnath N, Natarajan N, and Reid ME. Wood dust exposure and the risk of upper aerodigestive and respiratory cancers in males. *Occup Environ Med* 65(10):647-54, 2008.
42. Kauppinen TP, Partanen TJ, Hernberg SG, Nickels JI, Luukkonen RA, Hakulinen TR, and Pukkala EI. Chemical exposures and respiratory cancer among Finnish woodworkers. *Br J Ind Med* 50(2):143-8, 1993.
43. Kjuus H, Skjaerven R, Langard S, Lien JT, and Aamodt T. A case-referent study of lung cancer, occupational exposures and smoking. I. Comparison of title-based and exposure-based occupational information. *Scand J Work Environ Health* 12(3):193-202, 1986.
44. Kromhout H, Heederik D, Dalderup LM, and Kromhout D. Performance of two general job-exposure matrices in a study of lung cancer morbidity in the Zutphen cohort. *Am J Epidemiol* 136(6):698-711, 1992.
45. Leigh JP. Occupations, cigarette smoking, and lung cancer in the epidemiological follow-up to the NHANES I and the California Occupational Mortality Study. *Bull N Y Acad Med* 73(2):370-97, 1996.
46. Lerchen ML, Wiggins CL, and Samet JM. Lung cancer and occupation in New Mexico. *J Natl Cancer Inst* 79(4):639-45, 1987.
47. Levin LI, Zheng W, Blot WJ, Gao YT, and Fraumeni JF, Jr. Occupation and lung cancer in Shanghai: a case-control study. *Br J Ind Med* 45(7):450-8, 1988.
48. Lipscomb HJ and Dement JM. Respiratory diseases among union carpenters: cohort and case-control analyses. *Am J Ind Med* 33(2):131-50, 1998.
49. Luqman M, Javed MM, Daud S, Raheem N, Ahmad J, and Khan AU. Risk factors for lung cancer in the Pakistani population. *Asian Pac J Cancer Prev* 15(7):3035-9, 2014.
50. MacArthur AC, Le ND, Fang R, and Band PR. Identification of occupational cancer risk in British Columbia: a population-based case-control study of 2,998 lung cancers by histopathological subtype. *Am J Ind Med* 52(3):221-32, 2009.
51. Matos EL, Vilensky M, Mirabelli D, and Boffetta P. Occupational exposures and lung cancer in Buenos Aires, Argentina. *J Occup Environ Med* 42(6):653-9, 2000.
52. McConnell RB, Gordon KC, and Jones T. Occupational and personal factors in the aetiology of carcinoma of the lung. *Lancet* 2(6736):651-6, 1952.
53. Menck HR and Henderson BE. Occupational differences in rates of lung cancer. *J Occup Med* 18(12):797-801, 1976.
54. Mikoczy Z, Schutz A, Stromberg U, and Hagmar L. Cancer incidence and specific occupational exposures in the Swedish leather tanning industry: a cohort based case-control study. *Occup Environ Med* 53(7):463-7, 1996.
55. Milne KL, Sandler DP, Everson RB, and Brown SM. Lung cancer and occupation in Alameda County: a death certificate case-control study. *Am J Ind Med* 4(4):565-75, 1983.
56. Muscat JE, Stellman SD, Richie JP, Jr., and Wynder EL. Lung cancer risk and workplace exposures in black men and women. *Environ Res* 76(2):78-84, 1998.
57. Notani PN, Shah P, Jayant K, and Balakrishnan V. Occupation and cancers of the lung and bladder: a case-control study in Bombay. *Int J Epidemiol* 22(2):185-91, 1993.

58. Osann KE, Lowery JT, and Schell MJ. Small cell lung cancer in women: risk associated with smoking, prior respiratory disease, and occupation. *Lung Cancer* 28(1):1-10, 2000.
59. Peters S, Kromhout H, Olsson AC, Wichmann HE, Bruske I, Consonni D, Landi MT, Caporaso N, Siemiatycki J, Richiardi L, Mirabelli D, Simonato L, Gustavsson P, Plato N, Jockel KH, Ahrens W, Pohlabein H, Boffetta P, Brennan P, Zaridze D, Cassidy A, Lissowska J, Szeszenia-Dabrowska N, Rudnai P, Fabianova E, Forastiere F, Bencko V, Foretova L, Janout V, Stucker I, Dumitru RS, Benhamou S, Bueno-de-Mesquita B, Kendzia B, Pesch B, Straif K, Bruning T, and Vermeulen R. Occupational exposure to organic dust increases lung cancer risk in the general population. *Thorax* 67(2):111-6, 2012.
60. Pezzotto SM and Poletto L. Occupation and histopathology of lung cancer: A case-control study in Rosario, Argentina. *Am J Ind Med* 36(4):437-43, 1999.
61. Pronk A, Coble J, Ji BT, Shu XO, Rothman N, Yang G, Gao YT, Zheng W, and Chow WH. Occupational risk of lung cancer among lifetime non-smoking women in Shanghai, China. *Occup Environ Med* 66(10):672-8, 2009.
62. Pukkala E, Martinsen JI, Lynge E, Gunnarsdottir HK, Sørensen P, Tryggvadottir L, Weiderpass E, and Kjaerheim K. Occupation and cancer - follow-up of 15 million people in five Nordic countries. *Acta Oncol* 48(5):646-790, 2009.
63. Richiardi L, Boffetta P, Simonato L, Forastiere F, Zamboni P, Fortes C, Gaborieau V, and Merletti F. Occupational risk factors for lung cancer in men and women: a population-based case-control study in Italy. *Cancer Causes Control* 15(3):285-94, 2004.
64. Robinson C, Stern F, Halperin W, Venable H, Petersen M, Frazier T, Burnett C, Lalich N, Salg J, Sestito J, and et al. Assessment of mortality in the construction industry in the United States, 1984-1986. *Am J Ind Med* 28(1):49-70, 1995.
65. Robinson C, Fowler D, Brown D, and Lemen R. *Plywood Mill Workers Mortality Patterns 1945-1977*. Cincinnati, OH: National Institute for Occupational Safety and Health, 1986.
66. Ronco G, Ciccone G, Mirabelli D, Troia B, and Vineis P. Occupation and lung cancer in two industrialized areas of northern Italy. *Int J Cancer* 41(3):354-8, 1988.
67. Schraub S, Belon-Leneutre M, Mercier M, and Bourgeois P. Adenocarcinoma and wood. *Am J Epidemiol* 130(6):1164-6, 1989.
68. Siemiatycki J, *Risk factors for cancer in the workplace*. 1991: Boca Raton: CRC Press.
69. Siew SS, Kauppinen T, Kyyronen P, Heikkilä P, and Pukkala E. Occupational exposure to wood dust and formaldehyde and risk of nasal, nasopharyngeal, and lung cancer among Finnish men. *Cancer Manag Res* 4:223-32, 2012.
70. Simpson J, Roman E, Law G, and Pannett B. Women's occupation and cancer: preliminary analysis of cancer registrations in England and Wales, 1971-1990. *Am J Ind Med* 36(1):172-85, 1999.
71. Smalley G. Cancer incidence among workers exposed to softwood dust in Lithuania. *Occup Environ Med* 69(6):449-51, 2012.
72. Stellman SD and Garfinkel L. Cancer mortality among woodworkers. *Am J Ind Med* 5(5):343-57, 1984.
73. Stellman SD, Demers PA, Colin D, and Boffetta P. Cancer mortality and wood dust exposure among participants in the American Cancer Society Cancer Prevention Study-II (CPS-II). *Am J Ind Med* 34(3):229-37, 1998.
74. Swanson GM and Belle SH. Cancer morbidity among woodworkers in the U.S. automotive industry. *J Occup Med* 24(4):315-9, 1982.
75. Szadkowska-Stanczyk I and Szymczak W. Nested case-control study of lung cancer among pulp and paper workers in relation to exposure to dusts. *Am J Ind Med* 39(6):547-56, 2001.
76. Tse LA, Yu IT, Qiu H, Au JS, and Wang XR. Occupational risks and lung cancer burden for Chinese men: a population-based case-referent study. *Cancer Causes Control* 23(1):121-31, 2012.

77. Versluys JJ. Cancer and occupation in the Netherlands. *Br J Cancer* 3(2):161-85, 1949.
78. Wang QS, Boffetta P, Parkin DM, and Kogevinas M. Occupational risk factors for lung cancer in Tianjin, China. *Am J Ind Med* 28(3):353-62, 1995.
79. Weston TL, *Application of a job exposure matrix to assess cancer mortality risk in a cohort of working men*. 1998: Queen's University at Kingston.
80. Wu X, Delclos GL, Annegers JF, Bondy ML, Honn SE, Henry B, Hsu TC, and Spitz MR. A case-control study of wood dust exposure, mutagen sensitivity, and lung cancer risk. *Cancer Epidemiol Biomarkers Prev* 4(6):583-8, 1995.
81. Wu-Williams AH, Xu ZY, Blot WJ, Dai XD, Louie R, Xiao HP, Stone BJ, Sun XW, Yu SF, Feng YP, Fraumeni Jr JF, and Henderson BE. Occupation and lung cancer risk among women in northern China. *Am J Ind Med* 24(1):67-79, 1993.
82. Wunsch-Filho V, Moncau JE, Mirabelli D, and Boffetta P. Occupational risk factors of lung cancer in Sao Paulo, Brazil. *Scand J Work Environ Health* 24(2):118-24, 1998.
83. Yang Y, Wang M, Wang Z, and Zhan C. [A retrospective cohort study between wood dust and cancer]. *Chinese Journal of Industrial Medicine* 9(1):5-9, 1996.
84. Yang Y, Wang M, Wang Z, and Zhan C. [A cohort study on lung cancer and exposure to wood dust]. *Chinese Journal of Industrial Hygiene and Occupational Diseases* 15(5):277-81, 1997.
85. Zahm SH, Brownson RC, Chang JC, and Davis JR. Study of lung cancer histologic types, occupation, and smoking in Missouri. *Am J Ind Med* 15(5):565-78, 1989.
86. Acheson ED, Pippard EC, and Winter PD. Mortality of English furniture makers. *Scand J Work Environ Health* 10(4):211-7, 1984.
87. Andersen A, Barlow L, Engeland A, Kjaerheim K, Lynge E, and Pukkala E. Work-related cancer in the Nordic countries. *Scand J Work Environ Health* 25 Suppl 2:1-116, 1999.
88. Andersson E, Hagberg S, Nilsson T, Persson B, Wingren G, and Toren K. A case-referent study of cancer mortality among sulfate mill workers in Sweden. *Occupational and Environmental Medicine* 58(5):321-324, 2001.
89. Andersson E, Persson B, Bryngelsson IL, Magnuson A, and Westberg H. Cancer mortality in a Swedish cohort of pulp and paper mill workers. *Int Arch Occup Environ Health* 83(2):123-32, 2010.
90. Andersson E, Westberg H, Bryngelsson IL, Magnuson A, and Persson B. Cancer incidence among Swedish pulp and paper mill workers: a cohort study of sulphate and sulphite mills. *Int Arch Occup Environ Health* 86(5):529-40, 2013.
91. Baccarelli A, Tretiakova M, Gorbanev S, Lomtev A, Klimkina I, Tchibissov V, Averkina O, and Dosemeci M. Occupation and lung cancer risk in Leningrad Province, Russia. *Med Lav* 96(2):142-54, 2005.
92. Bardin-Mikolajczak A, Lissowska J, Zaridze D, Szeszenia-Dabrowska N, Rudnai P, Fabianova E, Mates D, Navratilova M, Bencko V, Janout V, Fevotte J, Fletcher T, Mannetje A, Brennan P, and Boffetta P. Occupation and risk of lung cancer in Central and Eastern Europe: the IARC multi-center case-control study. *Cancer Causes Control* 18(6):645-54, 2007.
93. Blair A, Walrath J, and Rogot E. Mortality patterns among U.S. veterans by occupation. I. Cancer. *J Natl Cancer Inst* 75(6):1039-47, 1985.
94. Blair A, Stewart PA, and Hoover RN. Mortality from lung cancer among workers employed in formaldehyde industries. *Am J Ind Med* 17(6):683-99, 1990.
95. Carpenter L and Roman E. Cancer and occupation in women: identifying associations using routinely collected national data. *Environ Health Perspect* 107 Suppl 2:299-303, 1999.
96. Carstensen JM, Pershagen G, and Eklund G. Smoking-adjusted incidence of lung cancer among Swedish men in different occupations. *Int J Epidemiol* 17(4):753-8, 1988.



97. Consonni D, De Matteis S, Lubin JH, Wacholder S, Tucker M, Pesatori AC, Caporaso NE, Bertazzi PA, and Landi MT. Lung cancer and occupation in a population-based case-control study. *Am J Epidemiol* 171(3):323-33, 2010.
98. Correa P, Pickle LW, Fontham E, Dalager N, Lin Y, Haenszel W, and Johnson WD. The causes of lung cancer in Louisiana. *Lung Cancer: Causes and Prevention*, Deerfield Beach: Verlag Cheine International:73-82, 1984.
99. Demers PA and Boffetta P, *Cancer Risk from Occupational Exposure to Wood Dust: A Pooled Analysis of Epidemiological Studies*. 1998: International Agency for Research on Cancer.
100. Etzel CJ, Kachroo S, Liu M, D'Amelio A, Dong Q, Cote ML, Wenzlaff AS, Hong WK, Greisinger AJ, Schwartz AG, and Spitz MR. Development and validation of a lung cancer risk prediction model for African-Americans. *Cancer Prev Res (Phila)* 1(4):255-65, 2008.
101. Gerhardsson MR, Norell SE, Kiviranta HJ, and Ahlbom A. Respiratory cancers in furniture workers. *Br J Ind Med* 42(6):403-5, 1985.
102. Gorlova OY, Zhang Y, Amos CI, and Spitz MR, *Lung cancer risk factors in never smokers: an analysis of epidemiological factors*, in *AACR Meeting Abstracts2005*. p. 520.
103. Haldorsen T, Andersen A, and Boffetta P. Smoking-adjusted incidence of lung cancer by occupation among Norwegian men. *Cancer Causes Control* 15(2):139-47, 2004.
104. Hall NE and Rosenman KD. Cancer by industry: analysis of a population-based cancer registry with an emphasis on blue-collar workers. *Am J Ind Med* 19(2):145-59, 1991.
105. Jappinen P, Pukkala E, and Tola S. Cancer incidence of workers in a Finnish sawmill. *Scand J Work Environ Health* 15(1):18-23, 1989.
106. Ji J and Hemminki K. Occupation and upper aerodigestive tract cancers: a follow-up study in Sweden. *J Occup Environ Med* 47(8):785-95, 2005.
107. Jockel KH, Ahrens W, Wichmann HE, Becher H, Bolm-Audorff U, Jahn I, Molik B, Greiser E, and Timm J. Occupational and environmental hazards associated with lung cancer. *Int J Epidemiol* 21(2):202-13, 1992.
108. Jockel KH, Ahrens W, Jahn I, Pohlabeln H, and Bolm-Audorff U. Occupational risk factors for lung cancer: a case-control study in West Germany. *Int J Epidemiol* 27(4):549-60, 1998.
109. Kauppinen TP, Partanen TJ, Nurminen MM, Nickels JI, Hernberg SG, Hakulinen TR, Pukkala EI, and Savonen ET. Respiratory cancers and chemical exposures in the wood industry: a nested case-control study. *Br J Ind Med* 43(2):84-90, 1986.
110. Kawachi I, Pearce N, and Fraser J. A New Zealand Cancer Registry-based study of cancer in wood workers. *Cancer* 64(12):2609-13, 1989.
111. Kreuzer M, Pohlabeln H, Ahrens W, Kreienbrock L, Bruske-Hohlfeld I, Jockel KH, and Wichmann HE. Occupational risk factors for lung cancer among young men. *Scand J Work Environ Health* 25(5):422-9, 1999.
112. Kreuzer M, Heinrich J, Kreienbrock L, Rosario AS, Gerken M, and Wichmann HE. Risk factors for lung cancer among nonsmoking women. *Int J Cancer* 100(6):706-13, 2002.
113. Kvale G, Bjelke E, and Heuch I. Occupational exposure and lung cancer risk. *Int J Cancer* 37(2):185-93, 1986.
114. Laakkonen A, Kyyronen P, Kauppinen T, and Pukkala EI. Occupational exposure to eight organic dusts and respiratory cancer among Finns. *Occup Environ Med* 63(11):726-33, 2006.
115. Laakkonen A, *Occupational exposure to organic dusts and cancer among Finnish workers: special emphasis on the food industry and agriculture*. 2008: Työterveyslaitos.
116. Matos E, Vilensky MV, and Boffetta PB. Environmental and occupational cancer in Argentina: a case-control lung cancer study. *Cad Saude Publica* 14 Suppl 3:77-86, 1998.

117. McHugh MK, Kachroo S, Liu M, D'Amelio AM, Jr., Dong Q, Hong WK, Greisinger AJ, Spitz MR, and Etzel CJ. Assessing environmental and occupational risk factors for lung cancer in Mexican-Americans. *Cancer Causes Control* 21(12):2157-64, 2010.
118. Miller BA, Blair AE, Raynor HL, Stewart PA, Zahm SH, and Fraumeni JF, Jr. Cancer and other mortality patterns among United States furniture workers. *Br J Ind Med* 46(8):508-15, 1989.
119. Miller BA, Blair A, and Reed EJ. Extended mortality follow-up among men and women in a U.S. furniture workers union. *Am J Ind Med* 25(4):537-49, 1994.
120. Morabia A, Markowitz S, Garibaldi K, and Wynder EL. Lung cancer and occupation: results of a multicentre case-control study. *Br J Ind Med* 49(10):721-7, 1992.
121. Olsen J and Sabroe S. Mortality among bricklayers and carpenters/cabinet makers. *Scand J Soc Med* 7(2):49-54, 1979.
122. Olsen J and Sabroe S. A follow-up study of non-retired and retired members of the Danish Carpenter/Cabinet Makers' Trade Union. *Int J Epidemiol* 8(4):375-82, 1979.
123. Olsen JH and Jensen OM. Occupation and risk of cancer in Denmark. An analysis of 93,810 cancer cases, 1970-1979. *Scand J Work Environ Health* 13 Suppl 1:1-91, 1987.
124. Olsen JH, Moller H, and Jensen OM. Risks for respiratory and gastric cancer in wood-working occupations in Denmark. *J Cancer Res Clin Oncol* 114(4):420-4, 1988.
125. Pohlabein H, Boffetta P, Ahrens W, Merletti F, Agudo A, Benhamou E, Benhamou S, Bruske-Hohlfeld I, Ferro G, Fortes C, Kreuzer M, Mendes A, Nyberg F, Pershagen G, Saracci R, Schmid G, Siemiatycki J, Simonato L, Whitley E, Wichmann HE, Winck C, Zambon P, and Jockel KH. Occupational risks for lung cancer among nonsmokers. *Epidemiology* 11(5):532-8, 2000.
126. Pukkala E, Teppo L, Hakulinen T, and Rimpela M. Occupation and smoking as risk determinants of lung cancer. *Int J Epidemiol* 12(3):290-6, 1983.
127. Rang EH and Acheson ED. Cancer in furniture workers. *Int J Epidemiol* 10(3):253-61, 1981.
128. Roscoe RJ, Steenland K, McCammon CS, Jr., Schober SE, Robinson CF, Halperin WE, and Fingerhut MA. Colon and stomach cancer mortality among automotive wood model makers. *J Occup Med* 34(8):759-68; discussion 769-70, 1992.
129. Sankila RJ, Karjalainen ES, Oksanen HM, Hakulinen TR, and Teppo LH. Relationship between occupation and lung cancer as analyzed by age and histologic type. *Cancer* 65(7):1651-6, 1990.
130. Schabath MB, Delclos GL, Martynowicz MM, Greisinger AJ, Lu C, Wu X, and Spitz MR. Opposing effects of emphysema, hay fever, and select genetic variants on lung cancer risk. *Am J Epidemiol* 161(5):412-22, 2005.
131. Schoenberg JB, Stemhagen A, Mason TJ, Patterson J, Bill J, and Altman R. Occupation and lung cancer risk among New Jersey white males. *J Natl Cancer Inst* 79(1):13-21, 1987.
132. Siemiatycki J, Richardson L, Gerin M, Goldberg M, Dewar R, Desy M, Campbell S, and Wacholder S. Associations between several sites of cancer and nine organic dusts: results from an hypothesis-generating case-control study in Montreal, 1979-1983. *Am J Epidemiol* 123(2):235-49, 1986.
133. Siemiatycki J. Discovering occupational carcinogens in population-based case-control studies: review of findings from an exposure-based approach and a methodologic .... *Occupational Cancer Epidemiology*, 1990.
134. Spitz MR, Hong WK, Amos CI, Wu X, Schabath MB, Dong Q, Shete S, and Etzel CJ. A risk model for prediction of lung cancer. *J Natl Cancer Inst* 99(9):715-26, 2007.
135. Tse LA, Yu IS, Au JS, Qiu H, and Wang XR. Silica dust, diesel exhaust, and painting work are the significant occupational risk factors for lung cancer in nonsmoking Chinese men. *Br J Cancer* 104(1):208-13, 2011.

136. Wang E, Dement JM, and Lipscomb H. Mortality among North Carolina construction workers, 1988-1994. *Appl Occup Environ Hyg* 14(1):45-58, 1999.
137. Yang Y, Wang M, Wang Z, and Zhan C. [Nested case-control studies of wood dust and cancer]. *Journal of Occupational Health and Damage* 11(2):65-7, 1996.
138. Yenugadhati N, Birkett NJ, Momoli F, and Krewski D. Occupations and lung cancer: a population-based case-control study in British Columbia. *J Toxicol Environ Health A* 72(10):658-75, 2009.
139. Yenugadhati N, Birkett N, Momoli F, and Krewski D. Industries and lung cancer: A population-based case-control study in British Columbia. *Toxicological and Environ Chemistry* 91(3):451-484, 2009.
140. Zeka A, Mannetje A, Zaridze D, Szeszenia-Dabrowska N, Rudnai P, Lissowska J, Fabianova E, Mates D, Bencko V, Navratilova M, Cassidy A, Janout V, Travier N, Fevotte J, Fletcher T, Brennan P, and Boffetta P. Lung cancer and occupation in nonsmokers: a multicenter case-control study in Europe. *Epidemiology* 17(6):615-23, 2006.
